# Supplementary material for: CXCL17 Attenuates Diesel Exhaust Emissions Exposure-Induced Lung Damage by Regulating Macrophage Function
Source: MDPI journal article supplement (doi:10.3390/toxics11080646), 2023-07-26
Supplement: s1 [file s1]

## *Supplementary Material*

### **1 Supplementary Figures and Tables**

#### **1.1 Supplementary Tables**

**supplementary Table S1.** Concentration of different pollutants from diesel exhaust emissions

| Parameter               | Value |
|-------------------------|-------|
| PM (mg/m <sup>3</sup> ) | 3.156 |
| NO <sub>x</sub> (ppm)   | 18.54 |
| CO (ppm)                | 10.37 |

PM; particulate matter, NO<sub>x</sub>; oxides of nitrogen, CO; carbon monoxide. Data are shown as mean.

**supplementary Table S2.** primer sequences

| Gene               | Forward                   | Reverse                   |
|--------------------|---------------------------|---------------------------|
| CXCL17-mus         | GGAAGGTGGCCAAGAATGTGA     | GATCACAGGGACACTGCTTCC     |
| IL6-mus            | CTTCTTGGGACTGATGCTGGTGAC  | TCTGTTGGGAGTGGTATCCTCTGTG |
| IL-8-mus           | GGCAAGAACACTGTGTCCAAAGA   | GTGGATGACTGTCCATGCAGAA    |
| TGF- $\beta$ -mus  | TTCGATTGAGCGCTCACTGCT     | CGGTTCATGTCATGGATGGTGC    |
| PDGFB-mus          | CATCCGCTCCTTTGATGATCTT    | GTGCTCGGGTCATGTTCAAGT     |
| GAP-mus            | CATCACTGCCACCCAGAAGACTG   | ATGCCAGTGAGCTTCCCGTTCAG   |
| CXCL17-homo        | CGGCCAAGAATGTGAGTGCAA     | TGTGGTGCCTTTGGTGTCTTG     |
| IL-6-homo          | ACTCACCTCTTCAGAACGAATTG   | CCATCTTTGGAAGGTTCAAGTTG   |
| IL-8-homo          | ACTGAGAGTGATTGAGAGTGGAC   | AACCCTCTGCACCCAGTTTTTC    |
| TGF- $\beta$ -homo | TACAGCAACAATTCCTGGCGATACC | CTCAACCACTGCCGCACAACCTC   |
| PDGFB-homo         | TCCCGAGGAGCTTTATGAGA      | ACTGCACGTTGCGGTTGT        |

GAPDH-homo

CAACGTGTCAGTGGTGGACCTG

GTGTCGCTGTTGAAGTCAGAGGAG

---

## 1.2 Supplementary Figures

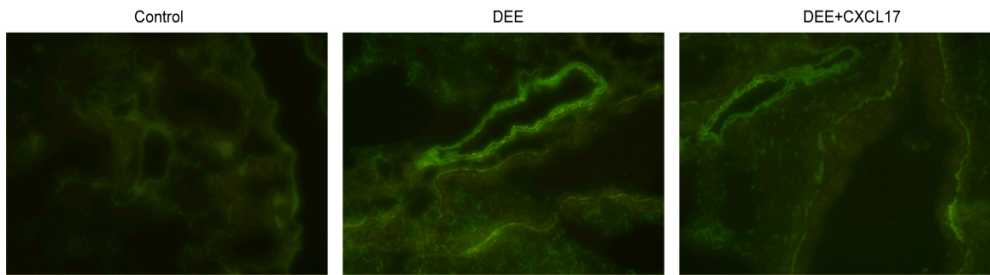

**Supplementary Figure S1.** Immunofluorescence staining on the airway of mice lung tissue
